# Supplementary material for: Efficient antimicrobial applications of two novel supramolecular metallogels derived from a l(+)-tartaric acid low molecular weight gelator
Source: Royal Society of Chemistry journal article supplement (doi:10.1039/d4ra03451a), 2024-01-01
Supplement: d4ra03451a1.pdf [file d4ra03451a1.pdf]

## Electronic Supplementary Information†

### Efficient antimicrobial applications of two novel supramolecular metallogels derived from L(+)-tartaric acid low molecular weight gelator†

Subhendu Dhibar,<sup>\*a,‡</sup> Suchetana Pal,<sup>b,‡</sup> Sangita Some,<sup>a</sup> Kripasindhu Karmakar,<sup>a</sup> Ratnakar Saha,<sup>c</sup> Subham Bhattacharjee,<sup>d</sup> Arpita Roy,<sup>e</sup> Soumya Jyoti Ray,<sup>e</sup> Timothy O. Ajiboye,<sup>f</sup> Somasri Dam,<sup>\*b</sup> Bidyut Saha,<sup>\*a</sup>

<sup>a</sup>Colloid Chemistry Laboratory, Department of Chemistry, The University of Burdwan, Golapbag, Burdwan-713104, West Bengal, India \*E-mail: sdhibar@scholar.buruniv.ac.in, Tel: +91 7001575909 (S. Dhibar); \*E-mail: bsaha@chem.buruniv.ac.in, Tel: +91 9476341691 (B. Saha).

<sup>b</sup>Department of Microbiology, The University of Burdwan, Burdwan-713104, West Bengal, India, \*E-mail: sdam@microbio.buruniv.ac.in (S. Dam).

<sup>c</sup>National Institute of Science Education and Research (NISER), Bhubaneswar, Odisha 752050, India.

<sup>d</sup>Department of Chemistry, Kazi Nazrul University, Asansol-713303, West Bengal, India.

<sup>e</sup>Department of Physics, Indian Institute of Technology Patna, Bihar-801106, India.

<sup>f</sup>Department of Chemistry, University of the Free State, Bloemfontein, 9301, South Africa.

‡SD and SP should be treated as joint first authors.

Comparative FTIR spectroscopy for Cd-TA vs tartaric acid & N, N-DMF:

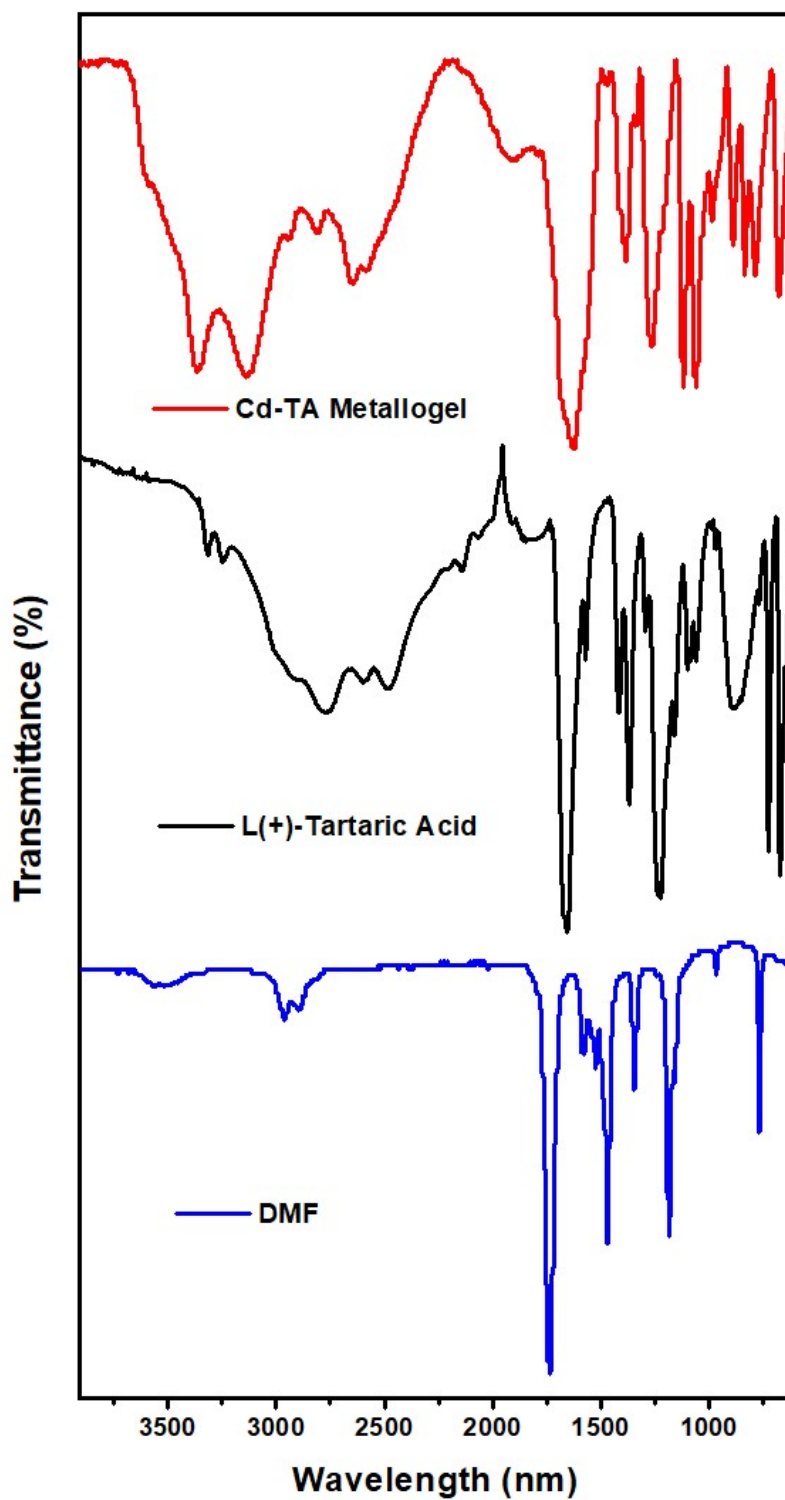

Fig. S1. FT-IR Spectra of Cd-TA metallogel in their xerogel, L(+)-tartaric acid and DMF form.

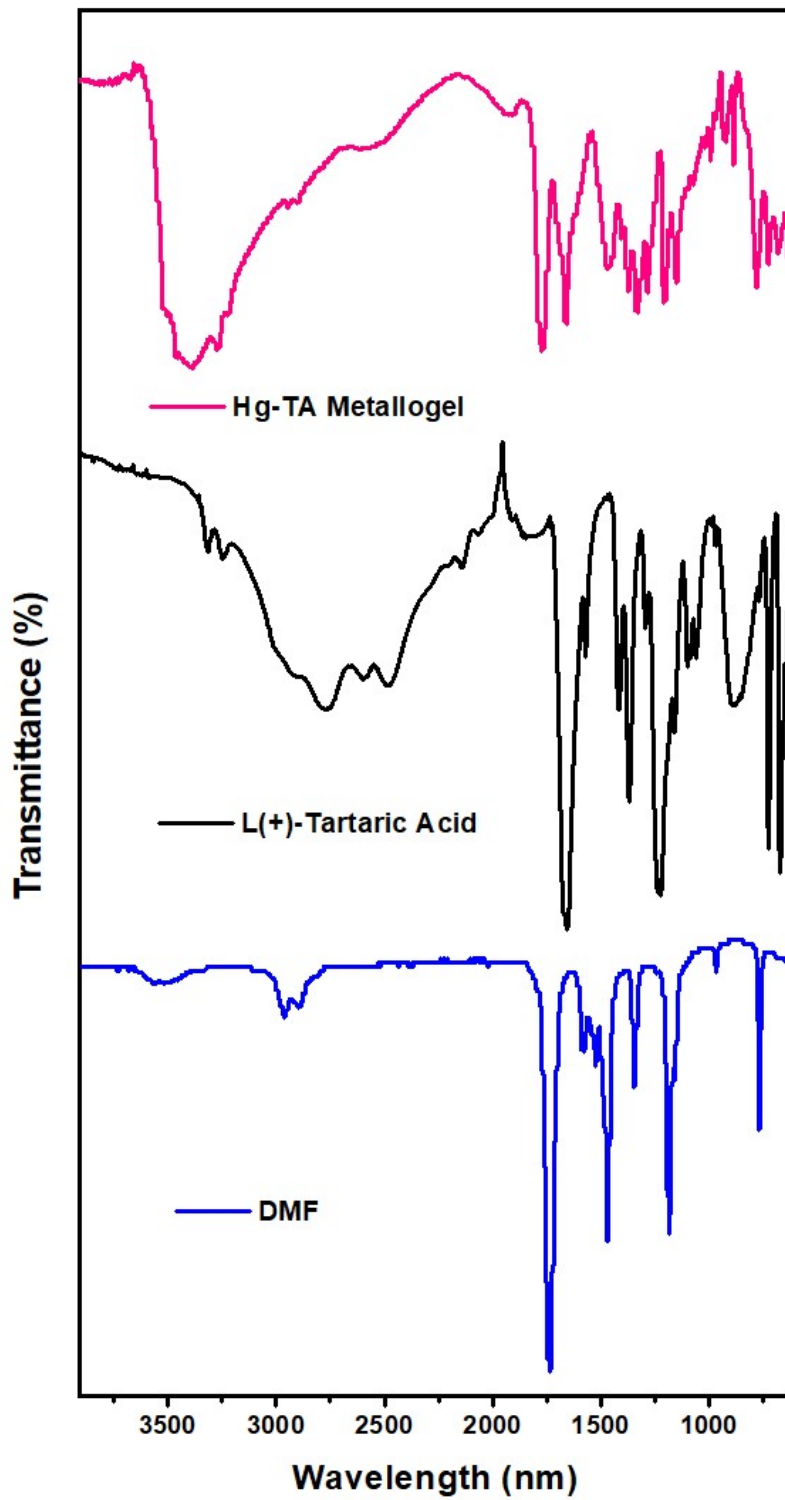

**Fig. S2:** FT-IR Spectra of Hg-TA metallogel in their xerogel, L(+)-tartaric acid and DMF form.

UV-Vis absorption spectra of Cd-TA metallogel:

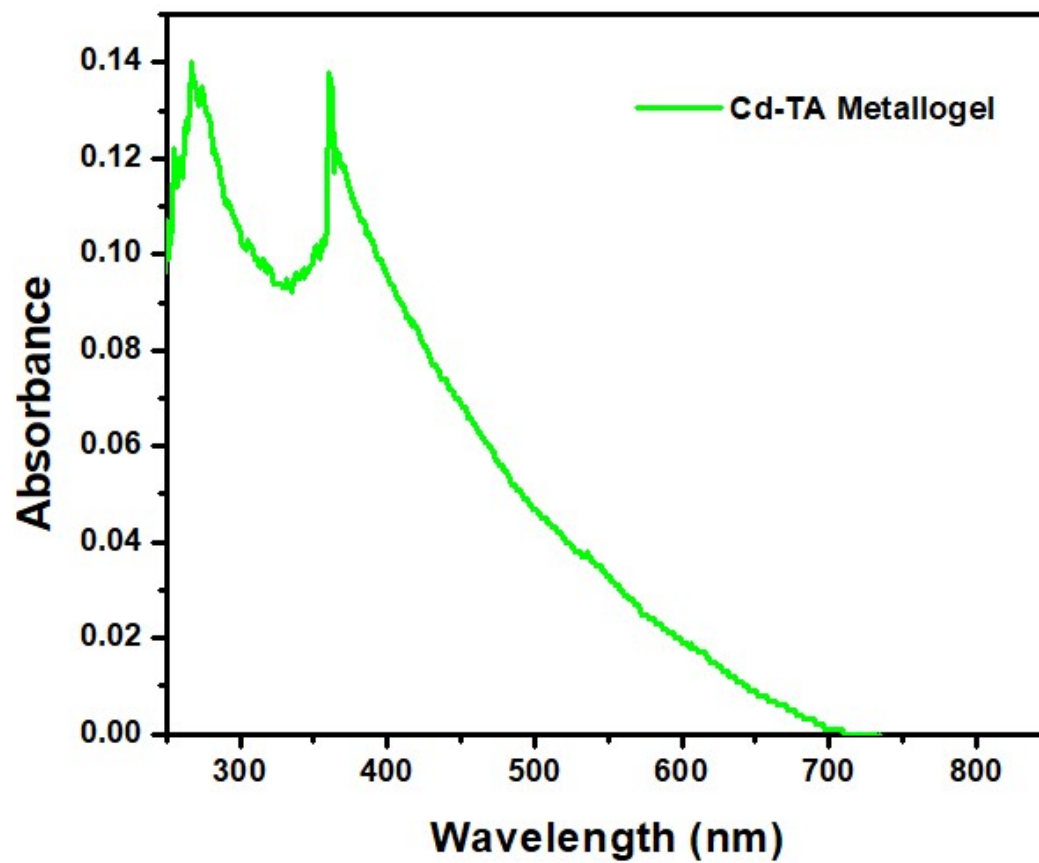

Fig. S3. UV-Vis absorption spectra of Cd-TA metallogel.

UV-Vis absorption spectra of Hg-TA metallogel:

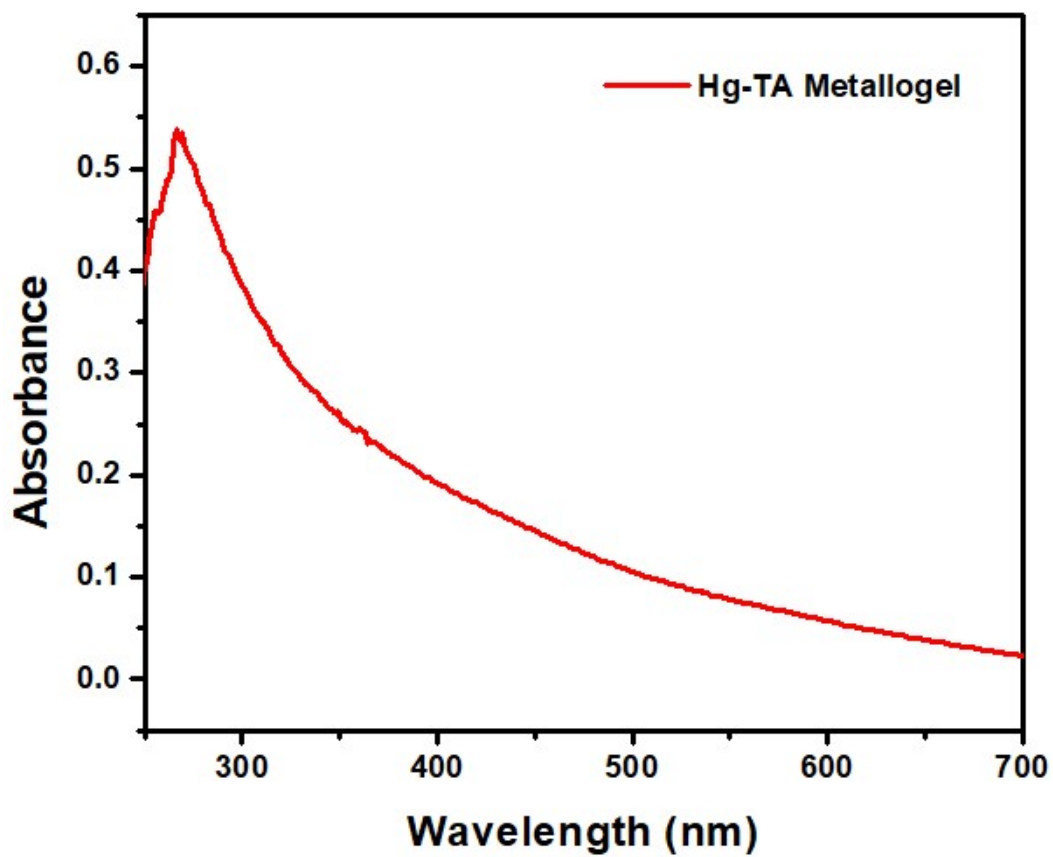

Fig. S4. UV-Vis absorption spectra of Hg-TA metallogel.
